# Supplementary material for: The dietary practices and beliefs of British South Asian people living with inflammatory bowel disease: a multicenter study from the United Kingdom
Source: PubMed Central journal article supplement — Intest Res. 2021 Jan 6;20(1):53–63. doi: 10.5217/ir.2020.00079 (PMC8831772; doi:10.5217/ir.2020.00079), 2021-01-06
Supplement: ir-2020-00079-suppl2.pdf [file ir-2020-00079-suppl2.pdf]

**Supplementary Material 1.** A questionnaire study on dietary practices and beliefs in South Asian patients with inflammatory bowel disease

## A Questionnaire Study on Dietary Practices and Beliefs in South Asian patients with Inflammatory Bowel Disease

(Version 1.0, 24<sup>th</sup> January 2019)

|                   |
|-------------------|
| Research ID _____ |
|-------------------|

|                                             |
|---------------------------------------------|
| Date (Day/Month/Year) _____ / _____ / _____ |
|---------------------------------------------|

**Questions for the research team to complete**

Please circle the appropriate number.

**Example:**

|        |       |
|--------|-------|
| 1. Yes | 2. No |
|--------|-------|

**Q1. Does the patient have Ulcerative colitis (UC), Crohn’s Disease (CD) or IBD unspecified?**

|       |       |         |
|-------|-------|---------|
| 1. UC | 2. CD | 3. IBDU |
|-------|-------|---------|

**Q2. What is the extent of this patient’s disease?**

Please complete table 2.1 for UC or 2.2 for CD

|                                               |                                                   |
|-----------------------------------------------|---------------------------------------------------|
| <b>2.1 Ulcerative Colitis (please circle)</b> |                                                   |
| E1                                            | Ulcerative proctitis: limited to rectum           |
| E2                                            | Left-sided UC: distal to splenic flexure          |
| E3                                            | Extensive UC: extends proximal to splenic flexure |
| <b>2.2 Crohn’s Disease</b>                    |                                                   |
| <b>Age (please circle)</b>                    |                                                   |
| A1                                            | 16 years or younger                               |
| A2                                            | 17-40 years                                       |
| A3                                            | >40 years                                         |
| <b>Location (please circle)</b>               |                                                   |
| L1                                            | Terminal ileum                                    |
| L2                                            | Colon                                             |
| L3                                            | Ileocolonic                                       |
| L4                                            | Upper GI                                          |
| <b>Behaviour (please circle)</b>              |                                                   |
| B1                                            | Non-stricturing/Non-penetrating                   |
| B2                                            | Stricturing                                       |
| B3                                            | Penetrating                                       |

**Q3. Which medications is this patient on for IBD?**

|                                                                     |        |       |
|---------------------------------------------------------------------|--------|-------|
| 1. Oral 5-aminosalicylic acids (Mesalazine or Sulfasalazine)        | 1. Yes | 2. No |
| 2. Immunomodulators (Azathioprine, Mercaptopurine, or Methotrexate) | 1. Yes | 2. No |
| 3. Biologics (Infliximab, Adalimumab, Golimumab, Vedolizumab, etc)  | 1. Yes | 2. No |
| 4. Topical 5-aminosalicylic acids (Enema or suppository)            | 1. Yes | 2. No |
| 5. Others (please specify _____)                                    | 1. Yes | 2. No |

**Q4. Latest investigation results within last 3 months (if performed).**

|                                    | Result | Date performed |
|------------------------------------|--------|----------------|
| CRP                                |        |                |
| Faecal Calprotectin                |        |                |
| Flexible Sigmoidoscopy/Colonoscopy |        |                |
| Abdominal Radiology (USS/CT/MRI)   |        |                |

**Q5. Disease Activity Score (Please complete 5.1 for UC and 5.2 for CD)**

| <b>5.1 Ulcerative Colitis (please circle)</b>          |                                                  |
|--------------------------------------------------------|--------------------------------------------------|
| <b>A. Stool Frequency (Total number of stools/day)</b> |                                                  |
| 0                                                      | Normal number of stools for this patient         |
| 1                                                      | 1-2 stools/day more than normal for this patient |
| 2                                                      | 3-4 stools/day more than normal for this patient |
| 3                                                      | ≥ 5 stools/day more than normal for this patient |
| <b>B. Rectal Bleeding</b>                              |                                                  |
| 0                                                      | No blood seen                                    |
| 1                                                      | Streaks of blood seen with < 50% of stools       |
| 2                                                      | Obvious blood seen with ≥ 50% of stools          |
| 3                                                      | Blood alone passed                               |

|                                                  |                          |
|--------------------------------------------------|--------------------------|
| <b>5.2 Crohn's Disease</b> (Please circle score) |                          |
| <b>General well-being</b>                        | Very well = 0            |
|                                                  | Slightly below par = 1   |
|                                                  | Poor = 2                 |
|                                                  | Very poor = 3            |
|                                                  | Terrible = 4             |
| <b>Abdominal Pain</b>                            | None = 0                 |
|                                                  | Mild = 1                 |
|                                                  | Moderate = 2             |
|                                                  | Severe = 3               |
| <b>Number of liquid stools per day</b>           | _____                    |
| <b>Complications</b>                             | None = 0                 |
|                                                  | Arthralgia = 1           |
|                                                  | Uveitis = 1              |
|                                                  | Erythema nodosum = 1     |
|                                                  | Aphthous ulcers = 1      |
|                                                  | Pyoderma gangrenosum = 1 |
|                                                  | Anal fissure = 1         |
|                                                  | New fistula = 1          |
|                                                  | Abscess = 1              |
| <b>Total Score</b>                               |                          |

**Questions for patients**

Please circle the appropriate number.

(Example)

|        |       |
|--------|-------|
| 1. Yes | 2. No |
|--------|-------|

**Q1. How many years ago were you diagnosed with Inflammatory Bowel Disease (IBD)?**

|             |
|-------------|
| _____ years |
|-------------|

**Q2. Do you consider that diet is the initiating factor for Inflammatory Bowel Disease?**

|        |       |
|--------|-------|
| 1. Yes | 2. No |
|--------|-------|

If your answer is **No**, please go to **Q3**

**Q2-2. If Yes, what is the source of this information? (Choose as many as apply)**

|     |                                                                        |
|-----|------------------------------------------------------------------------|
| 1.  | Your own experience                                                    |
| 2.  | Gastroenterologist / IBD specialist                                    |
| 3.  | General practitioner                                                   |
| 4.  | IBD nurse specialist / other nurse                                     |
| 5.  | Dietitian                                                              |
| 6.  | Internet (patient support organization such as Crohn's and Colitis UK) |
| 7.  | Internet (Other websites)                                              |
| 8.  | Information leaflet / book for IBD                                     |
| 9.  | Other patients with Ulcerative Colitis                                 |
| 10. | Other patients with Crohn's disease                                    |
| 11. | Family                                                                 |
| 12. | Friends                                                                |
| 13. | Social media                                                           |
| 14. | Television or Radio                                                    |
| 15. | Newspapers and magazines                                               |
| 16. | Other, please specify .....                                            |

**Q3. Have you had a relapse of Inflammatory Bowel Disease within the last 1 year?**

(In **ulcerative colitis** relapse is the presence of **rectal bleeding with increased bowel habits**. In **Crohn’s disease** relapse is the presence of **abdominal pain with or without increased bowel habits and rectal bleeding**)

|        |       |
|--------|-------|
| 1. Yes | 2. No |
|--------|-------|

**Q4. Do you consider that a dietary factor has ever triggered a relapse of your Inflammatory Bowel Disease?**

|        |       |
|--------|-------|
| 1. Yes | 2. No |
|--------|-------|

If your answer is **No**, please go to **Q5**

**Q4-2. If Yes, which food or drink do you think triggered the relapse? (Choose as many as apply)**

|     |                                  |
|-----|----------------------------------|
| 1.  | Fatty Foods                      |
| 2.  | White meat (e.g. chicken)        |
| 3.  | Red meat (e.g. beef, lamb, pork) |
| 4.  | Milk or milk products            |
| 5.  | Raw vegetables or raw fruit      |
| 6.  | Fish                             |
| 7.  | Spicy Foods                      |
| 8.  | Sweet foods                      |
| 9.  | Alcohol                          |
| 10. | Carbonated drinks                |
| 11. | Coffee                           |
| 12. | Tea                              |
| 13. | Other, please specify .....      |

**Q5. Do you consider that diet triggers a relapse of Inflammatory Bowel Disease?**

|        |       |
|--------|-------|
| 1. Yes | 2. No |
|--------|-------|

**Q6. Do you avoid certain foods or drink to try and prevent relapse of Inflammatory Bowel Disease?**

|                          |                             |                          |
|--------------------------|-----------------------------|--------------------------|
| 1. I <u>always</u> avoid | 2. I <u>sometimes</u> avoid | 3. I <u>do not</u> avoid |
|--------------------------|-----------------------------|--------------------------|

If you answered “**I do not avoid**” please go to **Q7**

**Q6-2. If you always or sometimes avoid certain foods or drink to prevent a relapse of Inflammatory Bowel Disease, which food or drink do you avoid (see options on next page)?**

**A. Fatty Foods**

|                          |                             |                          |
|--------------------------|-----------------------------|--------------------------|
| 1. I <u>always</u> avoid | 2. I <u>sometimes</u> avoid | 3. I <u>do not</u> avoid |
|--------------------------|-----------------------------|--------------------------|

If you answered “**I do not avoid**” please go to **B**

**A-2. If you always or sometimes avoid fatty foods to prevent a relapse, what is the source of this information? (Choose as many as apply)**

|     |                                                                        |
|-----|------------------------------------------------------------------------|
| 1.  | Your own experience                                                    |
| 2.  | Gastroenterologist / IBD specialist                                    |
| 3.  | General practitioner                                                   |
| 4.  | IBD nurse specialist / other nurse                                     |
| 5.  | Dietitian                                                              |
| 6.  | Internet (patient support organization such as Crohn’s and Colitis UK) |
| 7.  | Internet (Other websites)                                              |
| 8.  | Information leaflet / book for IBD                                     |
| 9.  | Other patients with Ulcerative Colitis                                 |
| 10. | Other patients with Crohn’s disease                                    |
| 11. | Family                                                                 |
| 12. | Friends                                                                |
| 13. | Social media                                                           |
| 14. | Television or Radio                                                    |
| 15. | Newspapers and magazines                                               |
| 16. | Other, please specify .....                                            |

**B. White meat (e.g. chicken)**

|                          |                             |                          |
|--------------------------|-----------------------------|--------------------------|
| 1. I <u>always</u> avoid | 2. I <u>sometimes</u> avoid | 3. I <u>do not</u> avoid |
|--------------------------|-----------------------------|--------------------------|

If you answered “**I do not avoid**” please go to **C**

**B-2. If you always or sometimes avoid white meat to prevent a relapse, what is the source of this information? (Choose as many as apply)**

|     |                                                                        |
|-----|------------------------------------------------------------------------|
| 1.  | Your own experience                                                    |
| 2.  | Gastroenterologist / IBD specialist                                    |
| 3.  | General practitioner                                                   |
| 4.  | IBD nurse specialist / other nurse                                     |
| 5.  | Dietitian                                                              |
| 6.  | Internet (patient support organization such as Crohn’s and Colitis UK) |
| 7.  | Internet (Other websites)                                              |
| 8.  | Information leaflet / book for IBD                                     |
| 9.  | Other patients with Ulcerative Colitis                                 |
| 10. | Other patients with Crohn’s disease                                    |
| 11. | Family                                                                 |
| 12. | Friends                                                                |
| 13. | Social media                                                           |
| 14. | Television or Radio                                                    |
| 15. | Newspapers and magazines                                               |
| 16. | Other, please specify .....                                            |

**C. Red Meat (e.g. beef, lamb, pork)**

|                          |                             |                          |
|--------------------------|-----------------------------|--------------------------|
| 1. I <u>always</u> avoid | 2. I <u>sometimes</u> avoid | 3. I <u>do not</u> avoid |
|--------------------------|-----------------------------|--------------------------|

If you answered “**I do not avoid**” please go to **D**

**C-2. If you always or sometimes avoid red meat to prevent a relapse, what is the source of this information? (Choose as many as apply)**

|     |                                                                        |
|-----|------------------------------------------------------------------------|
| 1.  | Your own experience                                                    |
| 2.  | Gastroenterologist / IBD specialist                                    |
| 3.  | General practitioner                                                   |
| 4.  | IBD nurse specialist / other nurse                                     |
| 5.  | Dietitian                                                              |
| 6.  | Internet (patient support organization such as Crohn’s and Colitis UK) |
| 7.  | Internet (Other websites)                                              |
| 8.  | Information leaflet / book for IBD                                     |
| 9.  | Other patients with Ulcerative Colitis                                 |
| 10. | Other patients with Crohn’s disease                                    |
| 11. | Family                                                                 |
| 12. | Friends                                                                |
| 13. | Social media                                                           |
| 14. | Television or Radio                                                    |
| 15. | Newspapers and magazines                                               |
| 16. | Other, please specify .....                                            |

**D. Milk or milk products**

|                          |                             |                          |
|--------------------------|-----------------------------|--------------------------|
| 1. I <u>always</u> avoid | 2. I <u>sometimes</u> avoid | 4. I <u>do not</u> avoid |
|--------------------------|-----------------------------|--------------------------|

If you answered “**I do not avoid**” please go to **E**

**D-2. If you always or sometimes avoid milk or milk products to prevent a relapse, what is the source of this information? (Choose as many as apply)**

|     |                                                                        |
|-----|------------------------------------------------------------------------|
| 1.  | Your own experience                                                    |
| 2.  | Gastroenterologist / IBD specialist                                    |
| 3.  | General practitioner                                                   |
| 4.  | IBD nurse specialist / other nurse                                     |
| 5.  | Dietitian                                                              |
| 6.  | Internet (patient support organization such as Crohn’s and Colitis UK) |
| 7.  | Internet (Other websites)                                              |
| 8.  | Information leaflet / book for IBD                                     |
| 9.  | Other patients with Ulcerative Colitis                                 |
| 10. | Other patients with Crohn’s disease                                    |
| 11. | Family                                                                 |
| 12. | Friends                                                                |
| 13. | Social media                                                           |
| 14. | Television or Radio                                                    |
| 15. | Newspapers and magazines                                               |
| 16. | Other, please specify .....                                            |

**E. Raw vegetables or raw fruit**

|                          |                             |                          |
|--------------------------|-----------------------------|--------------------------|
| 1. I <u>always</u> avoid | 2. I <u>sometimes</u> avoid | 3. I <u>do not</u> avoid |
|--------------------------|-----------------------------|--------------------------|

If you answered “I do not avoid” please go to **F**

**E-2. If you always or sometimes avoid raw vegetables or raw fruit to prevent a relapse, what is the source of this information? (Choose as many as apply)**

|     |                                                                        |
|-----|------------------------------------------------------------------------|
| 1.  | Your own experience                                                    |
| 2.  | Gastroenterologist / IBD specialist                                    |
| 3.  | General practitioner                                                   |
| 4.  | IBD nurse specialist / other nurse                                     |
| 5.  | Dietitian                                                              |
| 6.  | Internet (patient support organization such as Crohn’s and Colitis UK) |
| 7.  | Internet (Other websites)                                              |
| 8.  | Information leaflet / book for IBD                                     |
| 9.  | Other patients with Ulcerative Colitis                                 |
| 10. | Other patients with Crohn’s disease                                    |
| 11. | Family                                                                 |
| 12. | Friends                                                                |
| 13. | Social media                                                           |
| 14. | Television or Radio                                                    |
| 15. | Newspapers and magazines                                               |
| 16. | Other, please specify .....                                            |

**F. Fish**

|                          |                             |                          |
|--------------------------|-----------------------------|--------------------------|
| 1. I <u>always</u> avoid | 2. I <u>sometimes</u> avoid | 3. I <u>do not</u> avoid |
|--------------------------|-----------------------------|--------------------------|

If you answered “I do not avoid” please go to **G**

**F-2. If you always or sometimes avoid fish to prevent a relapse, what is the source of this information? (Choose as many as apply)**

|     |                                                                        |
|-----|------------------------------------------------------------------------|
| 1.  | Your own experience                                                    |
| 2.  | Gastroenterologist / IBD specialist                                    |
| 3.  | General practitioner                                                   |
| 4.  | IBD nurse specialist / other nurse                                     |
| 5.  | Dietitian                                                              |
| 6.  | Internet (patient support organization such as Crohn’s and Colitis UK) |
| 7.  | Internet (Other websites)                                              |
| 8.  | Information leaflet / book for IBD                                     |
| 9.  | Other patients with Ulcerative Colitis                                 |
| 10. | Other patients with Crohn’s disease                                    |
| 11. | Family                                                                 |
| 12. | Friends                                                                |
| 13. | Social media                                                           |
| 14. | Television or Radio                                                    |
| 15. | Newspapers and magazines                                               |
| 16. | Other, please specify .....                                            |



**G. Spicy Foods**

|                          |                             |                          |
|--------------------------|-----------------------------|--------------------------|
| 1. I <u>always</u> avoid | 2. I <u>sometimes</u> avoid | 3. I <u>do not</u> avoid |
|--------------------------|-----------------------------|--------------------------|

If you answered “**I do not avoid**” please go to **H**

**G-2. If you always or sometimes avoid spicy foods to prevent a relapse, what is the source of this information? (Choose as many as apply)**

|     |                                                                        |
|-----|------------------------------------------------------------------------|
| 1.  | Your own experience                                                    |
| 2.  | Gastroenterologist / IBD specialist                                    |
| 3.  | General practitioner                                                   |
| 4.  | IBD nurse specialist / other nurse                                     |
| 5.  | Dietitian                                                              |
| 6.  | Internet (patient support organization such as Crohn’s and Colitis UK) |
| 7.  | Internet (Other websites)                                              |
| 8.  | Information leaflet / book for IBD                                     |
| 9.  | Other patients with Ulcerative Colitis                                 |
| 10. | Other patients with Crohn’s disease                                    |
| 11. | Family                                                                 |
| 12. | Friends                                                                |
| 13. | Social media                                                           |
| 14. | Television or Radio                                                    |
| 15. | Newspapers and magazines                                               |
| 16. | Other, please specify .....                                            |

**H. Sweet Foods**

|                          |                             |                          |
|--------------------------|-----------------------------|--------------------------|
| 1. I <u>always</u> avoid | 2. I <u>sometimes</u> avoid | 3. I <u>do not</u> avoid |
|--------------------------|-----------------------------|--------------------------|

If you answered “**I do not avoid**” please go to **I**

**H-2. If you always or sometimes avoid sweet foods to prevent a relapse, what is the source of this information? (Choose as many as apply)**

|     |                                                                        |
|-----|------------------------------------------------------------------------|
| 1.  | Your own experience                                                    |
| 2.  | Gastroenterologist / IBD specialist                                    |
| 3.  | General practitioner                                                   |
| 4.  | IBD nurse specialist / other nurse                                     |
| 5.  | Dietitian                                                              |
| 6.  | Internet (patient support organization such as Crohn’s and Colitis UK) |
| 7.  | Internet (Other websites)                                              |
| 8.  | Information leaflet / book for IBD                                     |
| 9.  | Other patients with Ulcerative Colitis                                 |
| 10. | Other patients with Crohn’s disease                                    |
| 11. | Family                                                                 |
| 12. | Friends                                                                |
| 13. | Social media                                                           |
| 14. | Television or Radio                                                    |
| 15. | Newspapers and magazines                                               |
| 16. | Other, please specify .....                                            |

**I. Alcohol**

|                          |                             |                          |
|--------------------------|-----------------------------|--------------------------|
| 1. I <u>always</u> avoid | 2. I <u>sometimes</u> avoid | 3. I <u>do not</u> avoid |
|--------------------------|-----------------------------|--------------------------|

If you answered “**I do not avoid**” please go to **J**

**I-2. If you always or sometimes avoid alcohol to prevent a relapse, what is the source of this information? (Choose as many as apply)**

|     |                                                                        |
|-----|------------------------------------------------------------------------|
| 1.  | Your own experience                                                    |
| 2.  | Gastroenterologist / IBD specialist                                    |
| 3.  | General practitioner                                                   |
| 4.  | IBD nurse specialist / other nurse                                     |
| 5.  | Dietitian                                                              |
| 6.  | Internet (patient support organization such as Crohn’s and Colitis UK) |
| 7.  | Internet (Other websites)                                              |
| 8.  | Information leaflet / book for IBD                                     |
| 9.  | Other patients with Ulcerative Colitis                                 |
| 10. | Other patients with Crohn’s disease                                    |
| 11. | Family                                                                 |
| 12. | Friends                                                                |
| 13. | Social media                                                           |
| 14. | Television or Radio                                                    |
| 15. | Newspapers and magazines                                               |
| 16. | Other, please specify .....                                            |

**J. Carbonated Drinks**

|                          |                             |                          |
|--------------------------|-----------------------------|--------------------------|
| 1. I <u>always</u> avoid | 2. I <u>sometimes</u> avoid | 3. I <u>do not</u> avoid |
|--------------------------|-----------------------------|--------------------------|

If you answered “**I do not avoid**” please go to **K**

**J-2. If you always or sometimes avoid carbonated drinks to prevent a relapse, what is the source of this information? (Choose as many as apply)**

|     |                                                                        |
|-----|------------------------------------------------------------------------|
| 1.  | Your own experience                                                    |
| 2.  | Gastroenterologist / IBD specialist                                    |
| 3.  | General practitioner                                                   |
| 4.  | IBD nurse specialist / other nurse                                     |
| 5.  | Dietitian                                                              |
| 6.  | Internet (patient support organization such as Crohn’s and Colitis UK) |
| 7.  | Internet (Other websites)                                              |
| 8.  | Information leaflet / book for IBD                                     |
| 9.  | Other patients with Ulcerative Colitis                                 |
| 10. | Other patients with Crohn’s disease                                    |
| 11. | Family                                                                 |
| 12. | Friends                                                                |
| 13. | Social media                                                           |
| 14. | Television or Radio                                                    |
| 15. | Newspapers and magazines                                               |
| 16. | Other, please specify .....                                            |

**K. Coffee**

|                          |                             |                          |
|--------------------------|-----------------------------|--------------------------|
| 1. I <u>always</u> avoid | 2. I <u>sometimes</u> avoid | 3. I <u>do not</u> avoid |
|--------------------------|-----------------------------|--------------------------|

If you answered “**I do not avoid**” please go to **L**

**K-2. If you always or sometimes avoid coffee to prevent a relapse, what is the source of this information? (Choose as many as apply)**

|     |                                                                        |
|-----|------------------------------------------------------------------------|
| 1.  | Your own experience                                                    |
| 2.  | Gastroenterologist / IBD specialist                                    |
| 3.  | General practitioner                                                   |
| 4.  | IBD nurse specialist / other nurse                                     |
| 5.  | Dietitian                                                              |
| 6.  | Internet (patient support organization such as Crohn’s and Colitis UK) |
| 7.  | Internet (Other websites)                                              |
| 8.  | Information leaflet / book for IBD                                     |
| 9.  | Other patients with Ulcerative Colitis                                 |
| 10. | Other patients with Crohn’s disease                                    |
| 11. | Family                                                                 |
| 12. | Friends                                                                |
| 13. | Social media                                                           |
| 14. | Television or Radio                                                    |
| 15. | Newspapers and magazines                                               |
| 16. | Other, please specify .....                                            |

**L. Tea**

|                          |                             |                          |
|--------------------------|-----------------------------|--------------------------|
| 1. I <u>always</u> avoid | 2. I <u>sometimes</u> avoid | 3. I <u>do not</u> avoid |
|--------------------------|-----------------------------|--------------------------|

If you answered “**I do not avoid**” please go to **M**

**L-2. If you always or sometimes avoid tea to prevent a relapse, what is the source of this information? (Choose as many as apply)**

|     |                                                                        |
|-----|------------------------------------------------------------------------|
| 1.  | Your own experience                                                    |
| 2.  | Gastroenterologist / IBD specialist                                    |
| 3.  | General practitioner                                                   |
| 4.  | IBD nurse specialist / other nurse                                     |
| 5.  | Dietitian                                                              |
| 6.  | Internet (patient support organization such as Crohn’s and Colitis UK) |
| 7.  | Internet (Other websites)                                              |
| 8.  | Information leaflet / book for IBD                                     |
| 9.  | Other patients with Ulcerative Colitis                                 |
| 10. | Other patients with Crohn’s disease                                    |
| 11. | Family                                                                 |
| 12. | Friends                                                                |
| 13. | Social media                                                           |
| 14. | Television or Radio                                                    |
| 15. | Newspapers and magazines                                               |
| 16. | Other, please specify .....                                            |

**M. Other (please specify .....**)

|                          |                             |                          |
|--------------------------|-----------------------------|--------------------------|
| 1. I <u>always</u> avoid | 2. I <u>sometimes</u> avoid | 3. I <u>do not</u> avoid |
|--------------------------|-----------------------------|--------------------------|

If you answered “I do not avoid” please go to Q7

**M-2. If you always or sometimes avoid other foods or drinks to prevent a relapse, what is the source of this information? (Choose as many as apply)**

|     |                                                                        |
|-----|------------------------------------------------------------------------|
| 1.  | Your own experience                                                    |
| 2.  | Gastroenterologist / IBD specialist                                    |
| 3.  | General practitioner                                                   |
| 4.  | IBD nurse specialist / other nurse                                     |
| 5.  | Dietitian                                                              |
| 6.  | Internet (patient support organization such as Crohn’s and Colitis UK) |
| 7.  | Internet (Other websites)                                              |
| 8.  | Information leaflet / book for IBD                                     |
| 9.  | Other patients with Ulcerative Colitis                                 |
| 10. | Other patients with Crohn’s disease                                    |
| 11. | Family                                                                 |
| 12. | Friends                                                                |
| 13. | Social media                                                           |
| 14. | Television or Radio                                                    |
| 15. | Newspapers and magazines                                               |
| 16. | Other, please specify .....                                            |

**Q7. Do you consider that consuming certain foods, drink, or nutritional supplements can prevent a relapse of Inflammatory Bowel Disease?**

|        |       |
|--------|-------|
| 1. Yes | 2. No |
|--------|-------|

**Q8. Do you actually consume certain foods, drink, or nutritional supplements to prevent a relapse of Inflammatory Bowel Disease?**

|        |       |
|--------|-------|
| 1. Yes | 2. No |
|--------|-------|

If you answered No please go to Q9

**Q8-2. If Yes, which foods, drink, or nutritional supplements do you consume?**

|                                  |
|----------------------------------|
| Foods or drinks such as:         |
| Nutritional supplements such as: |

**Q8-3. What are your sources of the information regarding consuming certain foods, drink, or nutritional supplements for relapse prevention?**

(Choose as many as apply)

|     |                                                                        |
|-----|------------------------------------------------------------------------|
| 1.  | Your own experience                                                    |
| 2.  | Gastroenterologist / IBD specialist                                    |
| 3.  | General practitioner                                                   |
| 4.  | IBD nurse specialist / other nurse                                     |
| 5.  | Dietitian                                                              |
| 6.  | Internet (patient support organization such as Crohn's and Colitis UK) |
| 7.  | Internet (Other websites)                                              |
| 8.  | Information leaflet / book for IBD                                     |
| 9.  | Other patients with Ulcerative Colitis                                 |
| 10. | Other patients with Crohn's disease                                    |
| 11. | Family                                                                 |
| 12. | Friends                                                                |
| 13. | Social media                                                           |
| 14. | Television or Radio                                                    |
| 15. | Newspapers and magazines                                               |
| 16. | Other, please specify .....                                            |

**Q9. Do you consider the recommended diet in relapse of Inflammatory Bowel Disease to be same as that in remission of Inflammatory Bowel Disease?**

|        |       |
|--------|-------|
| 1. Yes | 2. No |
|--------|-------|

**Q10. Do you consider the recommended diet in preventing relapse of Ulcerative Colitis to be same as that in preventing relapse in Crohn's disease?**

|        |       |                 |
|--------|-------|-----------------|
| 1. Yes | 2. No | 3. I don't know |
|--------|-------|-----------------|

**Q11. When you search information for dietary recommendations, are you able to find specific advice for Inflammatory Bowel Disease?**

|        |       |
|--------|-------|
| 1. Yes | 2. No |
|--------|-------|

If your answer is **No** please move to **Q12**

**Q11-2. If Yes, please specify the information resources.**

**Q12. Do you avoid the same menu as the other members of the family living with you to prevent a relapse of Inflammatory Bowel Disease?**

|                          |                             |                          |
|--------------------------|-----------------------------|--------------------------|
| 1. I <u>always</u> avoid | 2. I <u>sometimes</u> avoid | 3. I <u>do not</u> avoid |
|--------------------------|-----------------------------|--------------------------|

**Q13. Do you avoid eating out for fear of causing a relapse of Inflammatory Bowel Disease?**

|                          |                             |                          |
|--------------------------|-----------------------------|--------------------------|
| 1. I <u>always</u> avoid | 2. I <u>sometimes</u> avoid | 3. I <u>do not</u> avoid |
|--------------------------|-----------------------------|--------------------------|

**Q14. Have you heard of or tried any of these specific diets? (please circle)**

|                                   |                                |                             |
|-----------------------------------|--------------------------------|-----------------------------|
| <b>Gluten free diet</b>           | 1. I have <b>heard</b> of this | 2. I have <b>tried</b> this |
| <b>Lactose free diet</b>          | 1. I have <b>heard</b> of this | 2. I have <b>tried</b> this |
| <b>Low FODMAPs diet</b>           | 1. I have <b>heard</b> of this | 2. I have <b>tried</b> this |
| <b>Specific carbohydrate diet</b> | 1. I have <b>heard</b> of this | 2. I have <b>tried</b> this |
| <b>Anti-inflammatory diet</b>     | 1. I have <b>heard</b> of this | 2. I have <b>tried</b> this |
| <b>Paleolithic diet</b>           | 1. I have <b>heard</b> of this | 2. I have <b>tried</b> this |

Finally, some questions about you.

**Q15. Are you male or female?**

|         |           |
|---------|-----------|
| 1. Male | 2. Female |
|---------|-----------|

**Q16. Please tell us your age?**

 years old

**Q17. How tall are you?**

 cm

**Q18. What is your weight?**

 kg

**Q19. In which country were you born?**

If you were born outside of the UK please move to **Q20**.

**Q19.1 If you were born in the UK, were your parents also born in the UK?**

|        |       |
|--------|-------|
| 1. Yes | 2. No |
|--------|-------|

**Q20. With which South Asian ethnicity do you identify yourself (please circle)?**

|    |                             |
|----|-----------------------------|
| 1. | Indian                      |
| 2. | Pakistani                   |
| 3. | Sri Lankan                  |
| 4. | Bangladeshi                 |
| 5. | Nepalese                    |
| 6. | Mixed (please specify ..... |
| 7. | Other (please specify ..... |

**Q21. Do you have any other medical conditions for which you need to avoid certain types of foods or drink? For example diabetes mellitus, high cholesterol, hypertension.**

|        |       |
|--------|-------|
| 3. Yes | 4. No |
|--------|-------|

If Yes please specify .....

**Q22. Who do you live with?**

|           |          |           |
|-----------|----------|-----------|
| 1. Family | 2. Alone | 3. Others |
|-----------|----------|-----------|

**Q23. Are you working full-time or part-time?**

|              |              |               |            |
|--------------|--------------|---------------|------------|
| 1. Full-time | 2. Part-time | 3. Unemployed | 4. Retired |
|--------------|--------------|---------------|------------|

**Q24. What is your highest level of educational qualification?**

|                                                   |
|---------------------------------------------------|
| 1. O-levels/GCSEs                                 |
| 2. A-levels                                       |
| 3. University degree                              |
| 4. Other professional qualifications e.g. diploma |

**Q25. Do you feel you are limited in your choices with foods or drink because of cost or income?**

|        |       |
|--------|-------|
| 1. Yes | 2. No |
|--------|-------|

**Thank you for taking the time to complete this questionnaire.**
